# Supplementary material for: Photoinduced ring-opening polymerisation of l-lactide via a photocaged superbase
Source: Royal Society of Chemistry journal article supplement (doi:10.1039/c8cc01913d), 2018-01-01
Supplement: c8cc01913d1.pdf [file c8cc01913d1.pdf]

Electronic Supplementary Information

**Photoinduced ring-opening polymerisation of L-lactide *via* a photocaged superbase**

P. K. Kuroishi<sup>a,b</sup> and A. P. Dove<sup>\*b</sup>

<sup>a</sup> Department of Chemistry, University of Warwick, Coventry, CV4 7AL, UK

<sup>b</sup> School of Chemistry, University of Birmingham, Edgbaston, Birmingham, B15 2TT, UK

\*a.dove@bham.ac.uk

**Table of Contents**

|                                                                                                                                                                                                                                                                                                                                                              |   |
|--------------------------------------------------------------------------------------------------------------------------------------------------------------------------------------------------------------------------------------------------------------------------------------------------------------------------------------------------------------|---|
| <b>Experimental Part</b>                                                                                                                                                                                                                                                                                                                                     | 3 |
| <b>Figures and Table</b>                                                                                                                                                                                                                                                                                                                                     | 4 |
| <b>Fig. S1</b> Plots of $\ln$ of initial monomer concentration by monomer concentration ( $\ln([M]_0/[M])$ ) against time for the ROP of L-LA (■, $[L-LA]_0/[BnOH]_0/[TMG]_0 = 50/1/0.5$ ), $\delta$ -VL (▲, $([\delta-VL]_0/[BnOH]_0/[TMG]_0/[TU]_0 = 30/1/1.5/1.5)$ , and $\epsilon$ -CL (●, $[\epsilon-CL]_0/[BnOH]_0/[TMG]_0/[TU]_0 = 25/1/1.25/1.25$ ). | 4 |
| <b>Fig. S2</b> Number-average molecular weight ( $M_n$ ; ■) and dispersity ( $D_M = M_w/M_n$ ; ○) against monomer-to-initiator concentration ratio ( $[M]/[I]$ ) for the ROP of L-LA.                                                                                                                                                                        | 5 |
| <b>Fig. S3</b> <sup>1</sup> H NMR spectrum of PLLA (CDCl <sub>3</sub> , 300 MHz, 298 K, * = residual CHCl <sub>3</sub> ). Reaction conditions: $[L-LA]_0/[BnOH]_0/[TMG]_0 = 50/1/0.5$ .                                                                                                                                                                      | 5 |
| <b>Fig. S4</b> MALDI-ToF MS spectrum of PLLA. Reaction conditions: $[L-LA]_0/[BnOH]_0/[TMG]_0 = 50/1/0.5$ .                                                                                                                                                                                                                                                  | 5 |
| <b>Fig. S5</b> <sup>1</sup> H NMR spectrum of PVL (CDCl <sub>3</sub> , 300 MHz, 298 K, * = residual CHCl <sub>3</sub> , ** = residual H <sub>2</sub> O). Reaction conditions: $[\delta-VL]_0/[BnOH]_0/[TMG]_0/[TU]_0 = 20/1/1/1$ .                                                                                                                           | 6 |
| <b>Fig. S6</b> MALDI-ToF MS spectrum of PVL. Reaction conditions: $[\delta-VL]_0/[BnOH]_0/[TMG]_0/[TU]_0 = 20/1/1/1$ .                                                                                                                                                                                                                                       | 6 |
| <b>Fig. S7</b> <sup>1</sup> H NMR spectrum of PCL (CDCl <sub>3</sub> , 300 MHz, 298 K, * = residual CHCl <sub>3</sub> ). Reaction conditions: $[\epsilon-CL]_0/[BnOH]_0/[TMG]_0/[TU]_0 = 25/1/1.25/1.25$ .                                                                                                                                                   | 6 |
| <b>Fig. S8</b> MALDI-ToF MS spectrum of PVL. Reaction conditions: $[\epsilon-CL]_0/[BnOH]_0/[TMG]_0/[TU]_0 = 25/1/1.25/1.25$ .                                                                                                                                                                                                                               | 7 |
| <b>Fig. S9</b> Photolysis of NPPOC-TMG under 320-400 nm UV irradiation.                                                                                                                                                                                                                                                                                      | 7 |
| <b>Fig. S10</b> <sup>1</sup> H NMR spectra of polymeric solution of L-LA in the presence of NPPOC-TMG before A) before and B) after 320–400 nm irradiation for 15 minutes and C) more 175 minutes in the absence of light (CDCl <sub>3</sub> , 300 MHz, 298 K).                                                                                              | 8 |
| <b>Table S1</b> Monomer conversion and molecular weight of PLLA prepared by irradiating the polymeric solutions containing NPPOC-TMG that were initially kept in the dark over 1, 2, 5 and 9 days.                                                                                                                                                           | 8 |

**Fig. S11** Plots of  $\ln$  of initial monomer concentration by monomer concentration ( $\ln([M]_0/[M])$ ) against time for the ROP of  $L$ -LA ( $[L-LA]_0/[BnOH]_0/[NPPOC-TMG]_0 = 100/1/1$ , 15 minutes under 320-400 nm irradiation). 8

**References**

9

## Experimental Part

### Materials

All chemicals and solvents, unless otherwise stated, were purchased from Sigma-Aldrich or Fisher Scientific and used without further purification. 1,1,3,3-Tetramethylguanidine,  $\delta$ -valerolactone,  $\epsilon$ -caprolactone and benzyl alcohol were dried over  $\text{CaH}_2$ , distilled and stored under an inert atmosphere.  $\text{CDCl}_3$  (Apollo Scientific) was dried over activated 4 Å molecular sieves and left to stand for 24 h before being transferred onto fresh 4 Å sieves and stand for further 24 h. 2-(Nitrophenyl)propoxycarbonyl-1,1,3,3-tetramethylguanidine was prepared as previously reported<sup>1</sup> and dried over  $\text{P}_2\text{O}_5$  in a vacuum desiccator for one week, in which  $\text{P}_2\text{O}_5$  was replaced every day. L-Lactide (Purac) was dissolved in  $\text{CH}_2\text{Cl}_2$  and passed through a silica plug. The solution was transferred to a Schlenk flask and concentrated under vacuum. The resulting solid was recrystallised twice from dry hot toluene (70 °C), sublimed and stored in a glove box. 1-(3,5-Bis(trifluoromethyl)phenyl)-3-cyclohexylthiourea (TU) was synthesised as previously reported<sup>2</sup> and dried over  $\text{CaH}_2$  in dry tetrahydrofuran (THF). Dry solvents were obtained by purification over an Innovative Technology SPS alumina solvent column and degassed by repeated freeze-pump-thaw cycles prior to use.

### General Considerations

Unless otherwise stated, all polymerisations were performed under an inert nitrogen atmosphere in a glovebox in the dark. Irradiation of samples was conducted in a Metalight QX1 light box equipped with 12 x 9 W bulbs ranging from 320 to 400 nm, with a peak output at 365 nm. Samples were typically placed 10 cm away from the source with the bulbs arranged concentrically around them.  $^1\text{H}$  NMR spectra were recorded on Bruker AV III HD-300 or AV III HD-500 MHz spectrometers at 298 K. Chemical shifts are reported as  $\delta$  in parts per million (ppm) and referenced to the residual solvent signal ( $\text{CDCl}_3$ :  $^1\text{H}$ ,  $\delta = 7.26$  ppm,  $^{13}\text{C}$ ,  $\delta = 77.2$  ppm). Matrix-assisted laser desorption ionisation-time of flight mass spectrometry (MALDI-ToF/MS) analysis was performed on a Bruker Autoflex Speed mass spectrometer using a nitrogen laser delivering 2 ns pulses at 337 nm with positive ion ToF detection performed using an accelerating voltage of 25 kV. *Trans*-2-[3-(4-tertbutylphenyl)-2-methyl-2-propylidene]malonitrile (DCTB) was used as a matrix (a 40 g L<sup>-1</sup> solution in THF), with sodium trifluoroacetate (NaTFA) used as a cationic agent (10 g L<sup>-1</sup> solution in THF). Analyte (1 g L<sup>-1</sup> solution in THF) was mixed with the DCTB and NaTFA solutions (20  $\mu\text{L}$  of each) and applied to form a thin matrix-analyte film. All samples were measured in reflectron mode and calibrated against a 3000 to 8000 g mol<sup>-1</sup> poly(ethylene glycol) standard. Size exclusion chromatography (SEC) was conducted on systems composed of a Varian 390-LC-Multi detector suite fitted with differential refractive index, light scattering, and ultraviolet detectors, equipped with a guard column (Varian Polymer Laboratories PLGel 5  $\mu\text{M}$ , 50  $\times$  7.5 mm) and two mixed D columns (Varian Polymer Laboratories PLGel 5  $\mu\text{M}$ , 300  $\times$  7.5 mm). The mobile phase was  $\text{CHCl}_3$  (HPLC grade) with 2%  $\text{Et}_3\text{N}$  at a flow rate of 1 mL min<sup>-1</sup>. SEC samples were calibrated against either Varian Polymer Laboratories Easi-Vials linear polystyrene standards (162 – 2.4  $\times$  10<sup>5</sup> g mol<sup>-1</sup>) ( $\text{CHCl}_3$ ) using Cirrus v3.3 software.

### General polymerisation procedure using TMG

L-LA (173 mg, 1.20 mmol) was dissolved in dry  $\text{CDCl}_3$  (567  $\mu\text{L}$ ). A solution of the benzyl alcohol initiator (26.0  $\mu\text{L}$  of a 100 g L<sup>-1</sup> solution in  $\text{CDCl}_3$ , 24.0  $\mu\text{mol}$ ) was added to the monomer solution, followed by TMG (6.9  $\mu\text{L}$  of a 200 g L<sup>-1</sup> solution in  $\text{CDCl}_3$ , 12.0  $\mu\text{mol}$ ).

The reaction solution was transferred to a NMR tube and monitored by  $^1\text{H}$  NMR spectroscopy. The polymerisation was quenched after 2.5 h by the addition acid Amberlyst and purified by precipitation in hexanes (1  $\times$ ) and methanol (2  $\times$ ) to yield PLLA as a white powder.  $^1\text{H}$  NMR (300 MHz,  $\text{CDCl}_3$ , 298 K)  $\delta$  7.34 (m,  $\text{C}_6\text{H}_5\text{CH}_2\text{O}$ ), 5.16 (q,  $^3J = 7.0$  Hz,  $\text{O}(\text{CO})\text{CHCH}_3$ ), 4.35 (m,  $\text{O}(\text{CO})\text{CHOH}$ ), 1.57 (d,  $^3J = 7.0$  Hz,  $\text{O}(\text{CO})\text{CHCH}_3$ ), 1.50 (m,  $\text{O}(\text{CO})\text{CH}(\text{CH}_3)\text{OH}$ ).  $^{13}\text{C}$  NMR (75 MHz,  $\text{CDCl}_3$ , 298 K) 169.7 ( $\text{O}(\text{CO})\text{CHCH}_3$ ), 69.2 ( $\text{O}(\text{CO})\text{CHCH}_3$ ), 16.8  $\text{O}(\text{CO})\text{CHCH}_3$ .

### General polymerisation procedure using NPPOC-TMG and UV light

L-LA (173 mg, 1.20 mmol) was dissolved in dry  $\text{CDCl}_3$  (509  $\mu\text{L}$ ). A solution of the benzyl alcohol initiator (52.0  $\mu\text{L}$  of a 50 g  $\text{L}^{-1}$  solution in  $\text{CDCl}_3$ , 24.0  $\mu\text{mol}$ ) was added to the monomer solution, followed by NPPOC-TMG (38.7  $\mu\text{L}$  of a 100 g  $\text{L}^{-1}$  solution in  $\text{CDCl}_3$ , 12.0  $\mu\text{mol}$ ). The reaction solution was transferred to a NMR tube and sealed. The solution was then subjected to UV irradiation for 15 minutes and monitored by  $^1\text{H}$  NMR spectroscopy. The polymerisation was quenched after 3 h by the addition acid Amberlyst and purified by precipitation in hexanes (1  $\times$ ) and methanol (2  $\times$ ) to yield PLLA as a white powder.

### Figures and Table

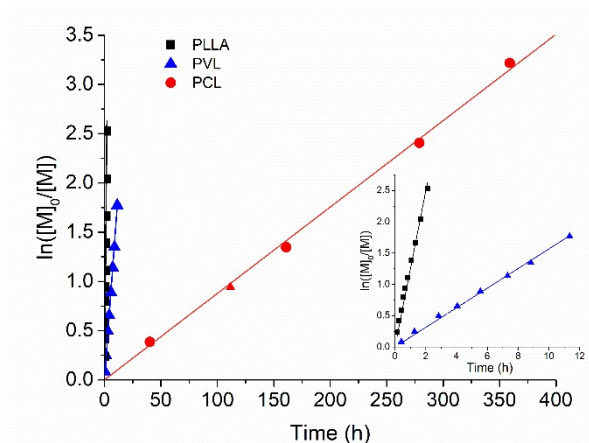

**Fig. S1** Plots of  $\ln$  of initial monomer concentration by monomer concentration ( $\ln([M]_0/[M])$ ) against time for the ROP of L-LA ( $\blacksquare$ ,  $[\text{L-LA}]_0/[\text{BnOH}]_0/[\text{TMG}]_0 = 50/1/0.5$ ),  $\delta$ -VL ( $\blacktriangle$ ,  $([\delta\text{-VL}]_0/[\text{BnOH}]_0/[\text{TMG}]_0/[\text{TU}]_0 = 30/1/1.5/1.5)$ ), and  $\epsilon$ -CL ( $\bullet$ ,  $[\epsilon\text{-CL}]_0/[\text{BnOH}]_0/[\text{TMG}]_0/[\text{TU}]_0 = 25/1/1.25/1.25$ ).

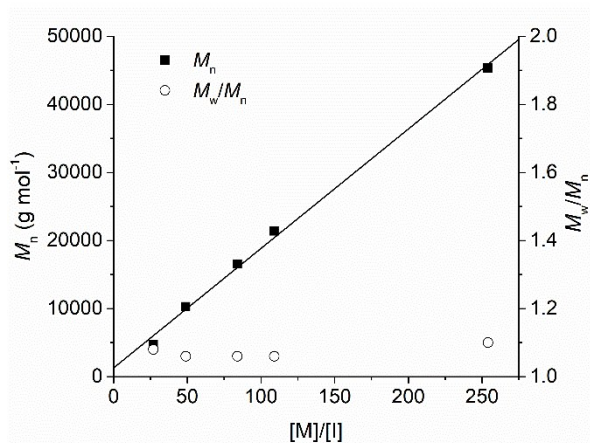

**Fig. S2** Number-average molecular weight ( $M_n$ ; ■) and dispersity ( $D_M = M_w/M_n$ ; ○) against monomer-to-initiator concentration ratio ( $[M]/[I]$ ) for the ROP of L-LA.

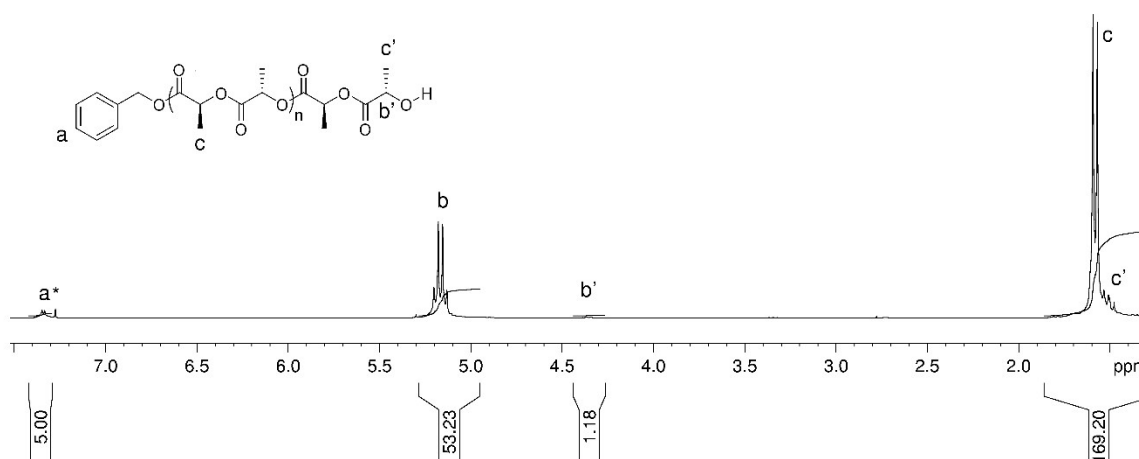

**Fig. S3** <sup>1</sup>H NMR spectrum of PLLA (CDCl<sub>3</sub>, 300 MHz, 298 K, \* = residual CHCl<sub>3</sub>). Reaction conditions:  $[L-LA]_0/[BnOH]_0/[TMG]_0 = 30/1/0.3$ .

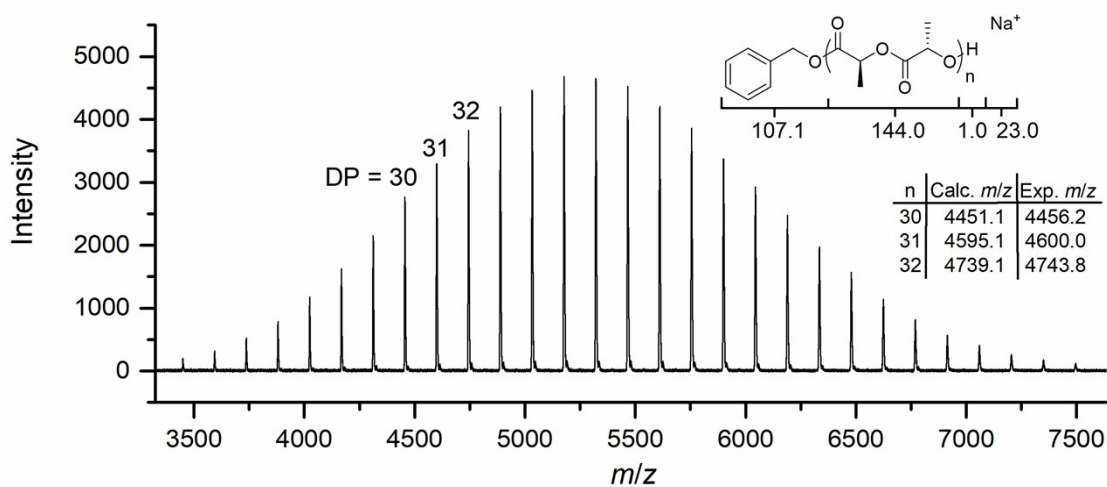

**Fig. S4** MALDI-ToF MS spectrum of PLLA. Reaction conditions:  $[L-LA]_0/[BnOH]_0/[TMG]_0 = 50/1/0.5$ .

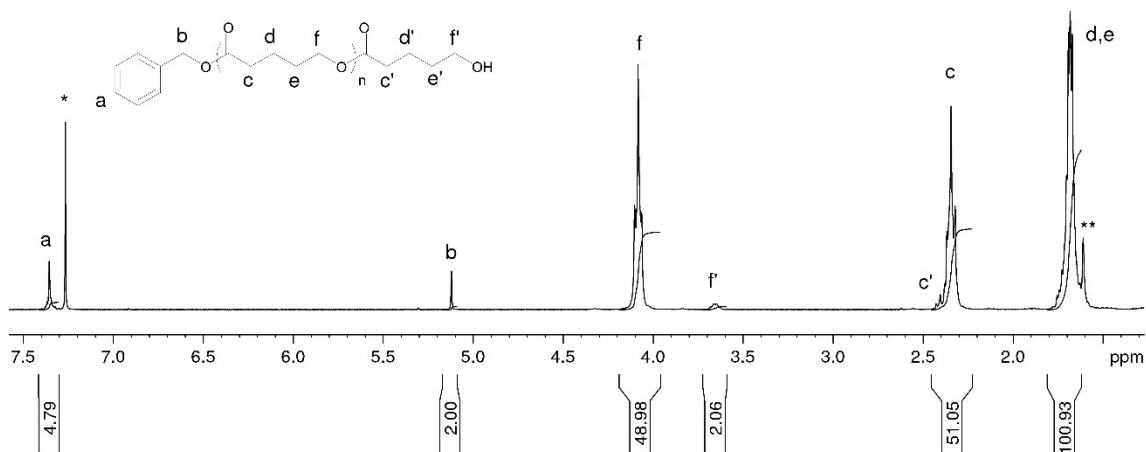

**Fig. S5**  $^1\text{H}$  NMR spectrum of PVL ( $\text{CDCl}_3$ , 300 MHz, 298 K, \* = residual  $\text{CHCl}_3$ , \*\* = residual  $\text{H}_2\text{O}$ ). Reaction conditions:  $[\delta\text{-VL}]_0/[\text{BnOH}]_0/[\text{TMG}]_0/[\text{TU}]_0 = 30/1/1.5/1.5$ .

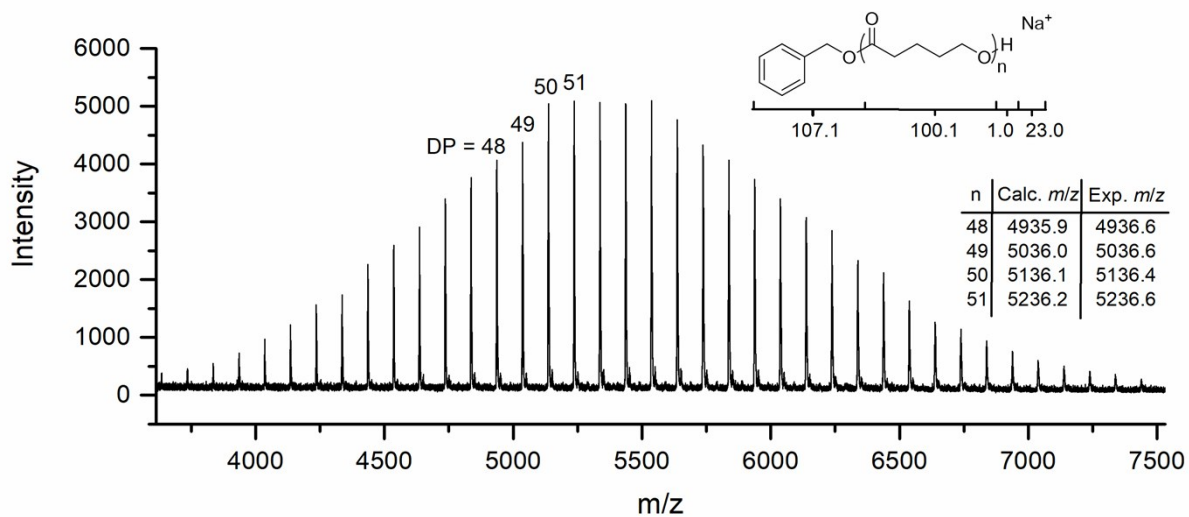

**Fig. S6** MALDI-ToF MS spectrum of PVL. Reaction conditions:  $[\delta\text{-VL}]_0/[\text{BnOH}]_0/[\text{TMG}]_0/[\text{TU}]_0 = 55/1/2.8/2.8$ .

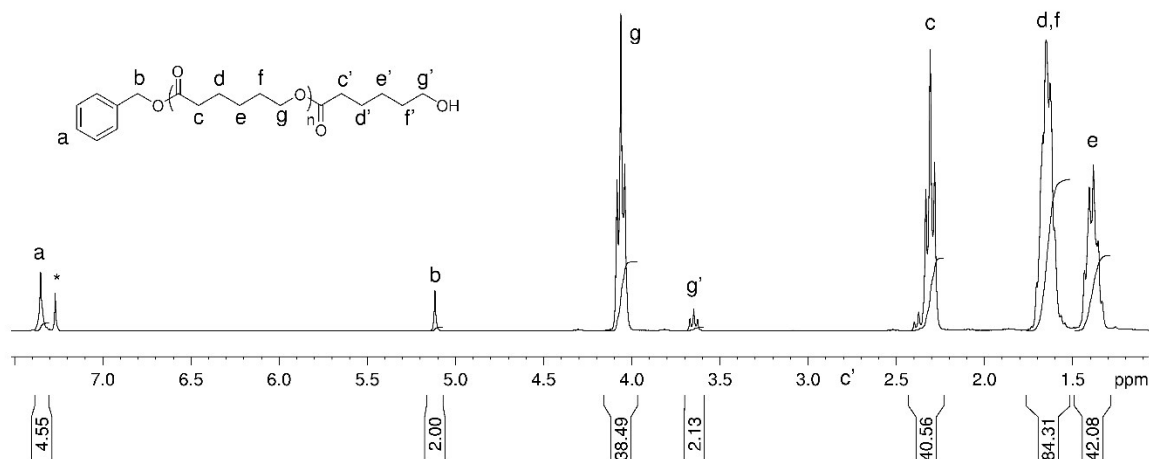

**Fig. S7** <sup>1</sup>H NMR spectrum of PCL (CDCl<sub>3</sub>, 300 MHz, 298 K, \* = residual CHCl<sub>3</sub>). Reaction conditions: [ε-CL]<sub>0</sub>/[BnOH]<sub>0</sub>/[TMG]<sub>0</sub>/[TU]<sub>0</sub> = 25/1/1.25/1.25).

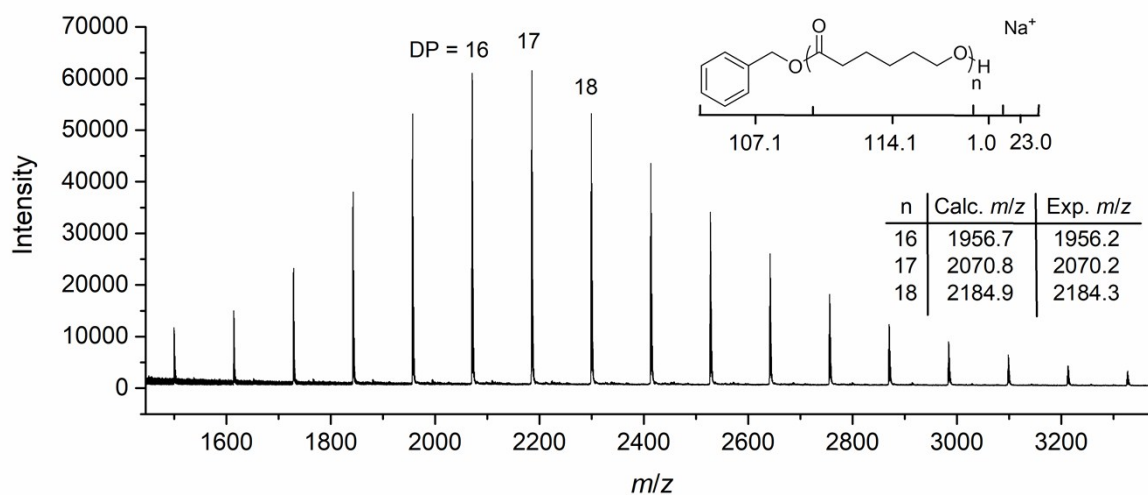

**Fig. S8** MALDI-ToF MS spectrum of PVL. Reaction conditions: [ε-CL]<sub>0</sub>/[BnOH]<sub>0</sub>/[TMG]<sub>0</sub>/[TU]<sub>0</sub> = 25/1/1.25/1.25).

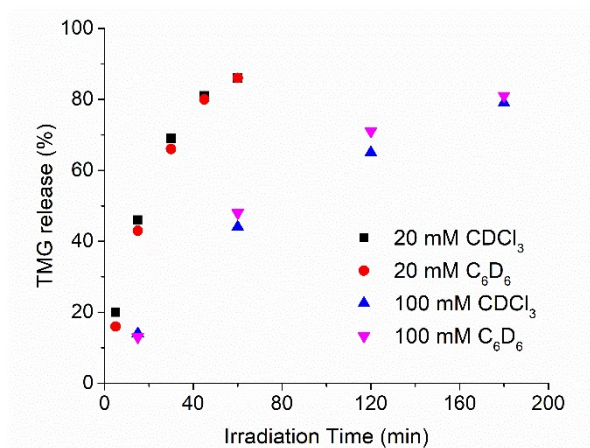

**Fig. S9** Photolysis of NPPOC-TMG under 320-400 nm UV irradiation.

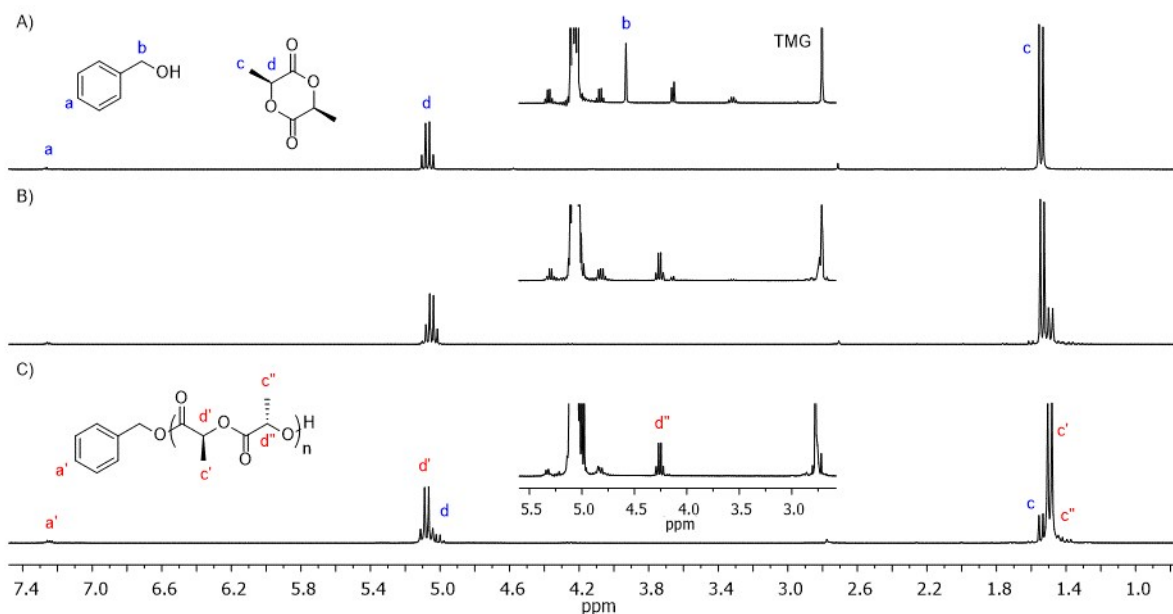

**Fig. S10**  $^1\text{H}$  NMR spectra of polymeric solution of L-LA in the presence of NPPOC-TMG before A) before and B) after 320–400 nm irradiation for 15 minutes and C) further 175 minutes in the absence of light ( $\text{CDCl}_3$ , 300 MHz, 298 K).

**Table S1** Monomer conversion and molecular weight of PLLA prepared by irradiating the polymeric solutions containing NPPOC-TMG that were initially kept in the dark over 1, 2, 5 and 9 days.

| Day | Monomer Conversion <sup>a</sup> (%) | $M_n^b$ ( $\text{kg mol}^{-1}$ ) | $\bar{D}_M^b$ |
|-----|-------------------------------------|----------------------------------|---------------|
| 1   | 90                                  | 9.9                              | 1.05          |
| 2   | 90                                  | 10.0                             | 1.05          |
| 5   | 91                                  | 10.0                             | 1.05          |
| 9   | 91                                  | 10.3                             | 1.06          |

<sup>a</sup> Determined by  $^1\text{H}$  NMR spectroscopy. <sup>b</sup> Obtained from SEC analysis in  $\text{CHCl}_3$ , calibrated against polystyrene standards.

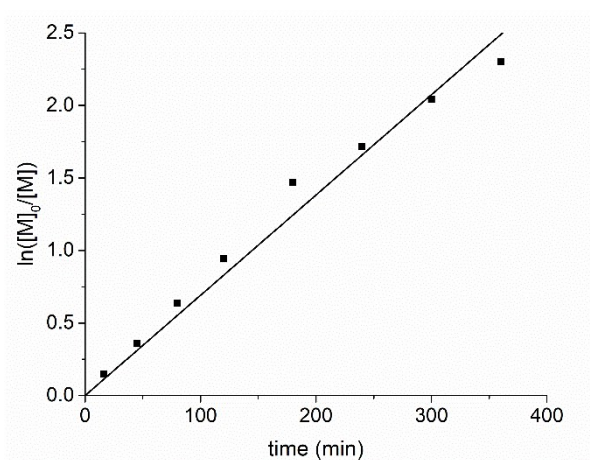

**Fig. S11** Plots of  $\ln$  of initial monomer concentration by monomer concentration ( $\ln([M]_0/[M])$ ) against time for the ROP of L-LA ( $[L\text{-LA}]_0/[BnOH]_0/[NPPOC\text{-TMG}]_0 = 100/1/1$ , 15 minutes under 320–400 nm irradiation).



## References

1. W. Xi, H. Peng, A. Aguirre-Soto, C. J. Kloxin, J. W. Stansbury and C. N. Bowman, *Macromolecules*, 2014, **47**, 6159.
2. R. C. Pratt, B. G. G. Lohmeijer, D. A. Long, P. N. P. Lundberg, A. P. Dove, H. Li, C. G. Wade, R. M. Waymouth and J. L. Hedrick, *Macromolecules*, 2006, **39**, 7863.
